# Supplementary material
Source: PubMed Central journal article supplement (PMC2682879)

### **Supplemental Figures**

**Supplemental Figure 1:** cDNA and protein sequence of human hnRNP G. Start and stop codons are shown in bold. The protein sequence is shown underneath the cDNA sequence in one letter code. The RRM domain is shown as a green box with the two RNP boxes as dark grey ovals. The proline rich region is shown in a pink box. SR residues are indicated in red, tyrosine residues in blue. The RGG and RG motifs are boxed.

**Supplemental Figure 2: Alignment of hnRNP G family members.** Rat hnRNP G, human hnRNP G, G-T and RBMY were aligned with Clustal W.

**Supplemental Figure 3: Sequences of exons that are regulated by hnRNP G.** Exons that showed a dependency on hnRNP G expression, both in array analysis and RT-PCR are listed. Exons that did not show this dependency in both assays are shown as controls. CCC and CCA triplets are indicated by shading. The per cent exon usage in transfection assays is indicated.

**Supplemental Figure 4: Longer exposure of a Western blot** with lysates from different tissues analyzed with an antiserum against hnRNP G (Similar to Figure 1C).

1 cttcctagttgggggtgcattaacccttgaccagcagctgtcacctgagctacttg  
 61 gaaggccctttggcgagctttagaggagcttgagaccttcaccgtcctgagactctt  
 121 cagcgggaaggaaag**ATG**GTTGAAGCAGATCGCCAGGAAAG**CTCTTCATTGGTGGGCTC**  
                                   M V E A D R P G K **L F I G G L** 15  
 44 AATACAGAAACAAATGAGAAAGCCCTGGAAGCAGTATTTGGCAAGTATGGACGGATAGTG  
    N T E T N E K A L E A V F G K Y G R I V 35  
 104 GAAATACTTTTGGATGAAAGACCGTGAGACCAACAAATCAAGAGGATTTGCTTTTGTACC  
    E I L L M K D R E T N K S **R G F A F V T** 55  
 164 TTCGAAAGCCAGCAGATGCTAAAGATGCAGCTAGAGATATGAATGGAAAGTCTTTGGAT  
    F E S P A D A K D A A R D M N G K S L D 75  
 224 GGAAAAGCCATTAAGGTAGAGCAAGCTACCAAACCATCTTTTGAAGTGGCAGGCGTGGAG  
    G K A I K V E Q A T K P S F E S **G R R G** 95  
 284 CCACCTCCACCTCCAAGAAGCAGAGGCCCTCCCAGAGGTCTTCGAGGAGGAAGTGGAGGA  
    P P P P P R **S R G** P P **R G** L **R G G** S G G 115  
 334 ACTAGGGGACCCCTTCACGTGGAGGATACATGGATGACGGTGGTTATTCCATGAACCTTT  
    T **R G** P P **S R G G** Y M D D G G Y S M N F 135  
 394 AACATGAGTTCTTCCAGGGGACCACTTCCAGTAAAAAGAGGACCACCACGAAGCGGG  
    N M S S **S R G** P L P V K **R G** P P P **R S** G 155  
 454 GGTCCCCCTCCTAAGAGATCAACACCTTCAGGACCAGTTTGAAGCAGCAGTGGAAATGGGT  
    G P P P K **R S** T P S G P V **R S** S S G M G 175  
 514 GGAAGAACGCCAGTGTCCCGTGGAAAGAGATAGCTATGGAGGCCACCAAGAAGGGAACCC  
    **G R** T P V **S R G R** D S Y G G P P R R E P 195  
 574 CTGCCATCTCGCAGAGATGTTTATTTGTCCCCAAGAGATGATGGATATTCTACAAAAGAC  
    L P **S R** R D V Y L S P R D D G Y S T K D 215  
 634 AGCTATTCAAGCAGAGATTACCCAAGTTCTCGAGACACCAGAGATTATGCACCACCACCA  
    S Y S **S R** D Y P S **S R** D T R D Y A P P P 235  
 694 AGAGATTATACTTACCGGATTACAGTCATTCCAGTTCCCGAGATGACTATCCGTCAAGA  
    R D Y T Y R D Y S H S S **S R** D D Y P **S R** 255  
 754 GGCTATGGTGATAGAGATGGATATGGTCGGGATCGTGAGTATTCAGATCATCCAAGTGGC  
    G Y G D R D G Y G R D R E Y S D H P S G 275  
 814 GGTTCTACAGAGATTCATATGAGAGCTATGGAAATTCGCGCAGTGCGCCCCCTACTCGT  
    G S Y R D S Y E S Y G N **S R S** A P P T R 295  
 874 GGGCCACCACCATCTTATGGAGGAAGCAGCCGCTATGATGATTACAGCAGCTCACGTGAT  
    G P P P S Y G G S **S R Y** D D Y S S **S R** D 315  
 934 GGATATGGTGGAAAGTCGAGACAGTTACTCAAGCAGCAGAAGTGATCTCTACTCAAGTGGC  
    G Y G G **S R** D S Y S S **S R S** D L Y S S **G** 335  
 994 CGTGATCGCGTCGGCAGACAAGAACGAGGGCTTCCCCCGTCTATGGAAAGGGGGTACCCT  
    **R** D R V **G R** Q E **R G** L P P S M E **R G** Y P 355  
 1054 CCTCCACGTGATTCCTACAGCAGTTCAAGCCGTGGAGCACCAAGAGGAGGTGGCCCGTGGAG  
    P P R D S Y S S S **S R** G A P **R G G G** **R G** 375  
 1114 GGGAGCCGATCTGATAGAGGGGAGGCAGAAGCAGATACT**TAG**aaacaaataagacttttg  
    **G S R S** D **R G G G R S R Y** \* 388  
 1174 atcaaggctccatgcagagaaacacaagatggaaagtctctgtcataactatcaaggac  
 1234 taataagagaagttgtgttaccttttttaattttctgttttaagttccccttcatttttg  
 1294 tgttcttgtaagaaaaagtaaacatgattaattttgatattatgaattgctttcaaca  
 1354 agcaaatgttaaatgtgtaagacttgacttgtactagtgttgtaattttccaagtaaaag  
 1414 tgtccctaaaggcaaaaaaaaaaaaaaaaaaaaaaaaaaaaaaaaaaaaaaaaaa

# Supplemental Figure 2

```

rat hnRNP G      MVEADRPGLKFIGGLNLETNEKALEAVFGKYGRIVEILLMKDRETNKSRGFVTFESPA 60
human hnRNP G    MVEADRPGLKFIGGLNLETNEKALEAVFGKYGRIVEVLLMKDRETNKSRGFVTFESPA 60
human hnRNP G-T  MVEADRPGLKFIGGLNLETDEKALEAEVFGKYGRIVEVLLMKDRETNKSRGFVTFESPA 60
human RBMY       MVEADHPGLKFIGGLNRETNEKMLKAVFGKHGPISEVLLIKDR-TSKSRGFVTFESPA 59
*****:***** **:* *:* *:* *:* *:* *:* *:* *:* *:* *:* *:* *

rat hnRNP G      DAKDAARDMNGKSLDGKAIKVEQATKPSFESG-RRGPPPPPSRGPPRGLRGG---SGGT 116
human hnRNP G    DAKDAARDMNGKSLDGKAIKVEQATKPSFESG-RRGPPPPPSRGPPRGLRGGRGSSGGT 119
human hnRNP G-T  DAKAAARDMNGKSLDGKAIKVAQATKPAFESS-RRGPPPP-RRSRGRPRFLRGTTRGGGGGP 118
human RBMY       DAKNAAKDMNGKSLHGKAIKVEQAKKPSFQSGGRRRPPASSRNRSPSGLSRSARGSRGGT 119
*** **:******.***** **:*:*:*:* ** **..*.*. . **.. **..

rat hnRNP G      R-GPPSRGGYMDGGYSMNFNMSSSRGPLPVKRGPPPSRGPPPKRSTPSGPVRSSSG-M 174
human hnRNP G    R-GPPSRGGHMDGGYSMNFNMSSSRGPLPVKRGPPPSRGPPPKRSAPSGPVRSSSG-M 177
human hnRNP G-T  R-RSPSRGGPDDDDGGYAADFDLRPSRAPMPMKRGPPRRRVGPPPKRAAPSGPARSSGGGM 177
human RBMY       RGWLPSHEGLDDGGYTPDLKMSYSRGLIPVKRGPPSRSGGPPPKKSAPSAVARNSNSW-M 178
* **:* * *****: :::: *:* :*:*****.* *****:::***. .***. *

rat hnRNP G      GGRTPVSRGRDSYGGPPRREPLPSRRDVYLSRDDGYSTKDS----- 216
human hnRNP G    GGRAPVSRGRDSYGGPPRREPLPSRRDVYLSRDDGYSTKDS----- 219
human hnRNP G-T  RGRALAVRGRDGYSGPPRREPLPRRDYLGPRDEGYSSRDG----- 219
human RBMY       GSQGPMSQRRENYGVPPRRATISSWRNDRMSTRHDGYATNDGNHPSCQETRDIYAPPSRGY 238
.: : *:*.* ***** .:.. *:* :..*:*:*:*:*.*

rat hnRNP G      -----YSS----- 219
human hnRNP G    -----YSS----- 222
human hnRNP G-T  -----YSS----- 222
human RBMY       AYRDNGHSNRDEHSSRGYRNHRSSRETRDIYAPPSRGHAYRDYGHSSRRDESYSRGYRNRRS 298
**

rat hnRNP G      -----RDYSSRDTRDIYAPPRDYTYRDYSHSS 247
human hnRNP G    -----RDYSSRDTRDIYAPPRDYTYRDYGHSS 250
human hnRNP G-T  -----RDY---REPRGFAPSPGEYTHRDYGHSS 247
human RBMY       SRETREYAPPSRGHGYRDYGHSSRRHESYSRGYRNHPSSRETRDIYAPPHRDYAYRDYGHSS 358
*:* *:*.*:*:* *:*:*:*:*.*

rat hnRNP G      SRDDYPSRGYSDRDYGG--RDREYSDHPSGGSYRDSYESYGNRSRAPSPTRGPPPSYGGSS 305
human hnRNP G    SRDDYPSRGYSDRDYGG--RDRDYSDHPSGGSYRDSYESYGNRSRAPSPTRGPPPSYGGSS 308
human hnRNP G-T  VRDDCPLRGYSDRDYGG--RDRDYGDHLSRGSHPFESYGELRGAAPGRGTPPSYGGGG 306
human RBMY       -WDEHSSRGYSYHDGYGEALGRDHSEHLSGSSYRDALQRYGTSHGAPPARGPRMSYGG-S 416
*:* . ***. :***** .*:::* * *:*:*.. : ** :.*.* ** . ***** .

rat hnRNP G      RYDDYS-SSRDYGGSRDSYSSS--RSDLYSSGRDRVGRQERGLPPSMERGYPPPRDSYS 362
human hnRNP G    RYDDYS-SSRDYGGSRDSYSSS--RSDLYSSGRDRVGRQERGLPPSMERGYPPPRDSYS 365
human hnRNP G-T  RYEEYRGYSPDAYSGGRDSYSSSYGRSDRYSRGRHRVGRPDRGLSLSMERGCPPQRDSYS 366
human RBMY       TCHAYS-NTRDRYGRSWESYSSC---GDFHYCDREHVCRKDQRNPPSLGRVLPDPREACG 472
. * : * * . . :*****. * : .*:* * * :. . * : * * * :*:.

rat hnRNP G      SSSRGAPRGGGRGGSRSRDRGGGRSRY 388
human hnRNP G    SSSRGAPRGGGRGGSRSRDRGGGRSRY 391
human hnRNP G-T  RSGCRVPRGGGRGGRLEGGGRSRY 392
human RBMY       SSSYVASIVDG-GESRSEKGD-SRY 496
* . .. * . * :*.. ***

```

# Supplemental Figure 3

| Gene                                                                                                   | Exon sequence                                                                                                                                                                                                                                                                                                                                                                                                                                                                                                                                   | % exon inclusion |            |
|--------------------------------------------------------------------------------------------------------|-------------------------------------------------------------------------------------------------------------------------------------------------------------------------------------------------------------------------------------------------------------------------------------------------------------------------------------------------------------------------------------------------------------------------------------------------------------------------------------------------------------------------------------------------|------------------|------------|
|                                                                                                        |                                                                                                                                                                                                                                                                                                                                                                                                                                                                                                                                                 | EGFP-C2          | hnRNP G-C2 |
| Casp7<br>Mus musculus caspase 7<br>NM_007611                                                           | GTATGGACGTCCGGAATGGGACGGACAAAGATGCAGGGGCCCTCTTCAAGTGCTTCCAAAA<br>CCTGGGTTTTGAAGTAACCGTCCACAATGACTGCTCTTGTGCAAAGATGCAAGATCTGCTT<br>AGAAAAG                                                                                                                                                                                                                                                                                                                                                                                                       | 2%               | 20%        |
| NOL5A 127.3.1<br>Homo sapiens nucleolar protein 5A (56kDa with<br>KKE/D repeat)<br>NM_006392           | ACCTGAATGCAGTTGTTCCCATGGCTGGGCCAGGCTTTGCAGTGATGACTTGCGAATCAAA<br>TCTGTCAATCCCCTGAGTGCAATCACTGATGTCTCCATGTCTCTGAGCAATGCCTGATGGG<br>GAGGGATCTAG                                                                                                                                                                                                                                                                                                                                                                                                   | 2.4%             | 5.1%       |
| CPSF4<br>Homo sapiens Cleavage and polyadenylation<br>specific factor 4, 30kDa<br>136.4.1<br>NM_006693 | GAGACTCTTCCCACTCCATCCTGAGACCTCCTCTTCTGGATCCCGGGACGCTCCCCTTGGT<br>TTCAGGACTCCTGACTCCCAGGCCCCCATTTCCACCGTCTGGGGACTCCTTTTACCCTCAC<br>TCGGACTCAGGAGTTCCTGCTCGGATCTTTGGCCCTCTGCGGCTGTTCAAAG                                                                                                                                                                                                                                                                                                                                                          | 1.9%             | 4%         |
| Fyn<br>Homo sapiens FYN oncogene related to SRC, FGR,<br>YES<br>907.002.002<br>NM_002037               | AAAGCTGATGGTTTGTGTTTTAACTTAACTGTGATTGCATCGAGTTGTACCCCAAACTT<br>CTGGATTGGCTAAAGATGCTTGGGAAGTTGCACGTCGTTCTGTTGTCTGGAGAAGAAGCT<br>GGGTCAGGGGTGTTTCGCTGAAGTGTGGCTT                                                                                                                                                                                                                                                                                                                                                                                  | 17,5%            | 28%        |
| USP39<br>Homo sapiens Ubiquitin specific protease 39<br>134.7.1<br>NM_006590                           | GGGACAGGCAAATGGTATGAATTACAAGACCTCCAGGTGACTGACATCCTTCCCCAGATGA<br>TCACACTGTGAGAGGCTTACATTCAG                                                                                                                                                                                                                                                                                                                                                                                                                                                     | 6%               | 9.3%       |
| SRRM1 110.3.1<br>Homo sapiens serine/arginine repetitive matrix 1<br>NM_005839                         | GATGCAGATGGGAAAGCGATGGCAATCGCCAGTGACTAAAAG                                                                                                                                                                                                                                                                                                                                                                                                                                                                                                      | 51%              | 60%        |
| CPSF6<br>Homo sapiens Cleavage and polyadenylation<br>specific factor 6, 68kDa<br>148.1.1<br>NM_007007 | CTGGACAGACTCCACCACGTCCACCCTTAGGTCCTCCAGGCCACCTGGTCCACCAGGTCC<br>TCCACCTCCTGGTCAGGTTCTGCCTCCTCCTTAGCTGGGCCTCCTAATCGAGGAGATCGC<br>CCTCCACCACAGTTCTTTTTCTGGACAACCTTTTGGGCAGCCTCCATTGGGTCCACTTC<br>CTCCTGGCCCTCCACCTCCAGTTCAGGCTACGGCCCCCTCCTGGCCCACCACCTCCACA<br>ACAGGGACCACCTCCACCTCCAGGCCCTTTCCACCTCGTCCACCCGGTCCACTTGGGCCA<br>CCCCTTACACTAGCTCCTCCTCCGCATCTTCTGGACCACCTCCAGGTGCCCCACCGCCAG<br>CTCCGCATGTGAACCCAGCTTTCTTTCTCCACCAACTAACAGTGGCATGCCTACATCAGA<br>TAGCCGAGGTCCACCACCAACAGATCCATATGGGCGACCTCCACCATATGATAGGGGTGAC<br>TATGGCCCCCTGGAAG | 97%              | 87%        |
| SFRS 6<br>Homo sapiens splicing factor, arginine/serine-rich 6<br>122.4.1<br>NM_006275                 | GTATGTTTTGTAATCAAGATAGAAATGATATGACTAATGCTTTAAAGTAAACTC<br>CTTTTATATTCTTATTTCTGGGAATTTATTATGGTATATAGATGTTTTAAGATTT<br>CCGAGTCTGACCAATCTTGTCTTTCAG                                                                                                                                                                                                                                                                                                                                                                                                | 25%              | 18%        |
| Casp9<br>Mus musculus caspase 9<br>NM_015733                                                           | GTTTTGTCTCCTGGAGGGACAAGAAAAGTGGCTCCTGGTACATCGAGACCTTGGATGGCAT<br>TCTGGAGCAGTGGGCTCGCTCTGAAGACCTGCAGTCCCTCCTTCTCAGG                                                                                                                                                                                                                                                                                                                                                                                                                              | 99%              | 70%        |
| SF3A2<br>Homo sapiens splicing factor 3a, subunit 2, 66kDa<br>150.2.1<br>NM_007165                     | GTGAGATCAGGGACTTGGGCGTGGGGGGCGGCCAAAGGCACCCAAGAGGCGGCTCTGCCAC<br>CCGGCCGTGTCCCTGCAG                                                                                                                                                                                                                                                                                                                                                                                                                                                             | 9.9%             | 6%         |
| U5-15kD<br>Mus musculus thioredoxin-like 4A (Txnl4a)<br>NM_025299                                      | GTGGTGGCATAAACATCGGGTGGTGTTCAGATCCTGCTGCCGGCAGCTCGAGGCTAGGATG<br>GCTGGAGATGTGAGGGCCTTTGTCTCATCACATCCGAGCACAGCTCAGCAAGATGCTCTTA<br>GCTAGAAAACAGATTTTATGTGTTAAT                                                                                                                                                                                                                                                                                                                                                                                   | 24.1%            | 16.9%      |
| SFRS3<br>Homo sapiens Splicing factor, arginine/serine-rich 3<br>39.5.1<br>NM_003017                   | AGTCACCATCATGTCTCTTCTCACACCCTCTGAATCTGCAT                                                                                                                                                                                                                                                                                                                                                                                                                                                                                                       | 24%              | 11%        |

Supplemental Figure 3

|                                                                                        |                                                                                                                                                                                                                                                                                                                                                                                                                                                                                                                                                                                                                                                                                                                                                                                                                                                                                                                                                                                                                                                                                                                    |              |             |
|----------------------------------------------------------------------------------------|--------------------------------------------------------------------------------------------------------------------------------------------------------------------------------------------------------------------------------------------------------------------------------------------------------------------------------------------------------------------------------------------------------------------------------------------------------------------------------------------------------------------------------------------------------------------------------------------------------------------------------------------------------------------------------------------------------------------------------------------------------------------------------------------------------------------------------------------------------------------------------------------------------------------------------------------------------------------------------------------------------------------------------------------------------------------------------------------------------------------|--------------|-------------|
| <p>SC35 NM_011358<br/>Mus musculus splicing factor, arginine/serine-rich 2 (Sfrs2)</p> | <p>GTAATGTCTGGGAATCCGAGACACATAACCCTAATTCATAAATGGGATTTGGGGTAGGTCT<br/>TTTTGAGTCGTGTTAATGTAAGAATGACTCCTATCATTAGGAGTGCTGCTCGGAGGTTACT<br/>CACCTTTGGGAGTAATACTGAAGAGAGGGGTCTGCAGAAAGGATGTGTATGAAGCTTAGAT<br/>AATAATGGCTGTTTCGTAAACTGTTTGAGACCTATTAATGAAAATGACTATTTCTTGCTGT<br/>TTTTATCCAACGTCTGCATTTTCCCCCTTTAAAGCTGCGGTCTCCTGTTTGATAAAAAGAAT<br/>ATTGGCCAGTATTGCAGATTTTAACTGATTTGGCTGATCCTCCAGGGACCAGTTTCTGTGG<br/>GCGTGTATTGGAGCAGGTTTGTCTTTAAATGTTAAAGATGCACTATCCTCTTAGAGAAAACA<br/>ATCAGTTCAACTATTGTTGACTGACTGGGACTTCATATTCTAATGGATGTGGCAAAAGAA<br/>TTGCAATAAGAAGCAGTGAACATTTGGAACCCAAAAGAAAGTTACAGGTATTGCACTGGG<br/>TGGGGAAAGGATAGTGTGTCTTTAACTCTTAAATTGTTTGGTCTATTTTTTAAAAAGGAA<br/>AGGGCCCTAAGTAGCTCAGATATTAAGTAGTATTCTCAATTAACAATGTTTCATTTGAA<br/>ACAATTTATCTTAATGAAATATAGACCAATTTCTGATCTCGAGTTGTTTTTGTGGATA<br/>CAGCCCTTTTTTTTTTCTTTTTTTTTCTTCCCCTTACCTTTCTTACCTTGGTTATTTGGC<br/>CAGGAATACGTAAATCAAACCTGTACATGCTGATGGTAGCCTTTGTGAAATTTTCTAAT<br/>TGGGCCTTTTTAAAAACATGGCTGGGTGGAACATTTCTGTACCCTACTGGTTTGACCAGAGC<br/>CTTAGTAAGTACGTGCCTGAAACTGAAACCATGTGCACTTTAATGGAAGGTAAGCTGAACT<br/>TCTTTCTTTTCAAACCTAG</p> | <p>22.5%</p> | <p>6.2%</p> |
| <p>SF2/ASF NM_173374<br/>Mus musculus splicing factor, arginine/serine-rich 1</p>      | <p>GGAGAACTGCCTACATCCGGGTAAAGTTGATGGGCCCAAGAGTCCAAGTTATGGAAGAT<br/>CTCGATCTCGAAGCCGTAGTCTGTAGCAGAAGCCGTAGCAGAAGCAACAGCAGGAGTCCGAG<br/>TTACTCCCCAAGGAGAAGCAGAGGATCACCCAGCTATTCTCCCCGTATAGCAGATCTCGC<br/>TCTCGTACATAA</p>                                                                                                                                                                                                                                                                                                                                                                                                                                                                                                                                                                                                                                                                                                                                                                                                                                                                                            | <p>12%</p>   | <p>2%</p>   |

Control exons

| Gene       | Exon sequence                                                                                                                                                  |  |  |
|------------|----------------------------------------------------------------------------------------------------------------------------------------------------------------|--|--|
| hnRNP M    | ATGGCCTTGGTGGTATTGGCATGGGGTTAGGACCAGGAGGGCAACCCATTGATGCCAATCA<br>CCTGAATAAAGGCATCGGAATGGGAAACATAGGTCCCGCAG                                                     |  |  |
| Fe65       | TGTTTTCGCCGTGCGCTCCCTAGGCTGGGTAGAGATGACCGAGGAGGAGCTGGCCCCCTGGAC<br>GCAGCAGTGTGGCAGTCAACAATTGCATCCGTGAGCTCTTTACCAAAAAACAACCTGCA<br>TGACCCCATGTCTGGGGGCTGGGGGGAA |  |  |
| SFRS14     | GGGAACCCCTCGGAAGGGGAAGGGTTGGGTGCTGACGGGCAGGAGCACAAAGAAGACACA<br>TTTCGATGTGTTCCGACAGAGGATGATGCAGATGTACAGACACAAGCGGGCCAACAAATAG                                  |  |  |
| Ku antigen | GAGACTATAAATATTCAGGAAGAGATAGTTTTGATTTTTTTGGTTGATGCCTCCAAGGCTAT<br>GTTTGAATCTCAGAGTGAAGATGAGTTGACACCTTTTGACATGAGCATCCAG                                         |  |  |
| SNRPD1     | GTGTGGATGTCAGCATGAATACACATCTTAAAGCTGTGAAAATGACCCCTGAAGAACAGAGA<br>ACCTGTACAGCTGGAAACGCTGAGTATTCCAGGAAATAACATTCGGTATTTTATTCTACCA<br>G                           |  |  |
| hnRNP C    | ATATTAACCTGGCTGCAGAGCCAAAAGTGAACCGAGGAAAAGCAGGTGTGAAACGATCTGC<br>AGCGGAGATGTACGGGTGAGTAACAGAACCCCTTCTCCGTCCCCCTCTACTCAG                                        |  |  |
| hnRNPA2B1  | GCAACTTTGGCTTTGGGGATTACGTTGGTGGCGGTGGAATTTTCGGACCAGGACCAGGAAG<br>TAACCTTAGAGGAGGATCTG                                                                          |  |  |
| Caspase 2  | GTGCTATTGGATCCCTTGGGCACCTCCTTCTGTTCACTGCTGCCACCGCCTCTCTTGCTCT                                                                                                  |  |  |
| hnRNP K    | GTTGGGTTCAAGTGTGATGAAACTTGGGATTCTGCAATTGACACATGGAGCCCATCAGAAT<br>GGCAAATGGCTTATGAACCACAG                                                                       |  |  |

# Supplemental Figure 4

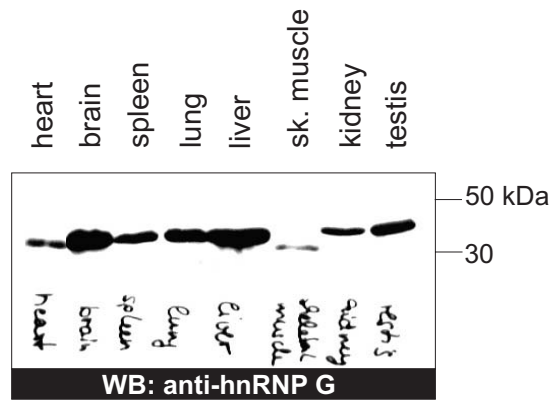

Supplement: M901026200_1.pdf [file M901026200_1.pdf]
